# Supplementary material for: Ultrafast enzymatic digestion of proteins by microdroplet mass spectrometry
Source: PubMed Central journal article supplement (PMC7044307; doi:10.1038/s41467-020-14877-x), 2020-02-26
Supplement: 41467_2020_14877_MOESM1_ESM.pdf [file 41467_2020_14877_MOESM1_ESM.pdf]

## Supplementary Information

# Ultrafast enzymatic digestion of proteins by microdroplet mass spectrometry

*Xiaoqin Zhong,<sup>a</sup> Hao Chen,<sup>b</sup> Richard N. Zare<sup>a,\*</sup>*

*<sup>a</sup>Department of Chemistry, Fudan University, Shanghai, 200438, China*

*<sup>b</sup>Department of Chemistry and Environmental Science, New Jersey Institute of  
Technology, Newark, NJ 07102, USA*

*\*Correspondence should be addressed to Richard N. Zare*

*[rnz@fudan.edu.cn](mailto:rnz@fudan.edu.cn)*

**Supplementary Method 1:** Size distribution measurement of droplets generated by a commercial ESI sprayer and a homebuilt ESSi sprayer with a laser particle analyzer.

Laser particle analyzer: HELOS (Hi208, Sympatec GmbH, Suzhou, China).

Commercial ESI sprayer: The heated ESI source, fitted for a high-resolution mass spectrometer (LTQ Orbitrap Elite, Thermo Scientific, San Jose, CA), has a tip size of 500  $\mu\text{m}$  in diameter. An aqueous solution containing 5 mM  $\text{NH}_4\text{HCO}_3$  (pH 8) was infused with a syringe at a flow rate of 20  $\mu\text{L}/\text{min}$ , with assistance of a sheath gas flow rate of 10 arbitrary units (10 psi) and a high voltage of +3 kV.

Homebuilt ESSi sprayer: from the tip of a fused silica inner capillary (148  $\mu\text{m}$  o.d., 50  $\mu\text{m}$  i.d., Polymicro Technologies, China), aqueous solution containing 5 mM  $\text{NH}_4\text{HCO}_3$  (pH 8) was infused with a syringe at a flow rate of 20  $\mu\text{L}/\text{min}$ , with assistance of a nebulizing gas of dry  $\text{N}_2$  with a pressure of 120 psi and a high voltage of +3 kV.

### Droplet Size Distribution

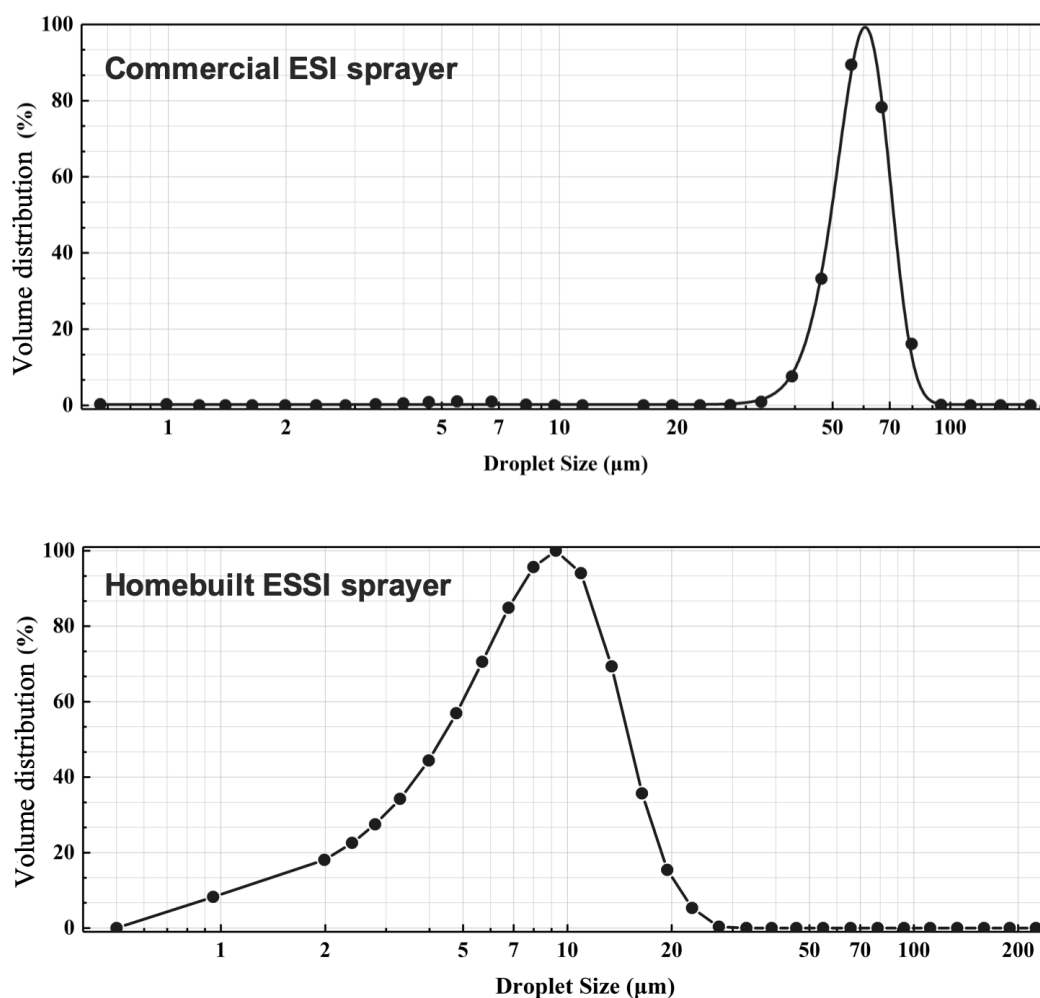

**Supplementary Figure 1:** Size distribution measurement of droplets generated by a commercial ESI sprayer and a homebuilt ESSi sprayer with a laser particle analyzer.

**Supplementary Table 1:** 26 peptide fragment peaks from the digestion of human ACTH (1-24) with ESSI-MS. A positive voltage of 3 kV was applied for the digestion and detection. The peptide sequence is SYSMEHFR|WGKPVGK|K|R|RPVK|VYP, where vertical lines indicate the expected cleavage sites for trypsin digestion.

| Observed <i>m/z</i> |        | <i>z</i> | Peptide sequence            |
|---------------------|--------|----------|-----------------------------|
| No. 1               | 219.1  | 3        | (K)RRPVK(V)                 |
| 2                   | 261.8  | 3        | (K)KRRPVK(V)                |
| 3                   | 300.5  | 3        | (R)WGKPVGKK(R)              |
| 4                   | 338.8  | 3        | (K)RRPVKVYP(-)              |
| 5                   | 352.5  | 3        | (-)SYSMEHFR(W)              |
| 6                   | 380.0  | 5        | (R)WGKPVGKKRRPVKVYP(-)      |
| 7                   | 381.5  | 3        | (K)KRRPVKVYP(-)             |
| 8                   | 386.2  | 2        | (R)WGKPVGK(K)               |
| 9                   | 392.2  | 2        | (K)KRRPVK(V)                |
| 10                  | 429.7  | 2        | (R)RPVKVYP(-)               |
| 11                  | 450.2  | 2        | (R)WGKPVGKK(R)              |
| 12                  | 474.5  | 4        | (R)WGKPVGKKRRPVKVYP(-)      |
| 13                  | 507.8  | 2        | (K)RRPVKVYP(-)              |
| 14                  | 528.7  | 2        | (R)WGKPVGKKR(R)             |
| 15                  | 571.8  | 2        | (K)KRRPVKVYP(-)             |
| 16                  | 603.6  | 3        | (-)SYSMEHFRWGKPVGK(K)       |
| 17                  | 632.4  | 3        | (R)WGKPVGKKRRPVKVYP(-)      |
| 18                  | 646.3  | 3        | (-)SYSMEHFRWGKPVGKK(R)      |
| 19                  | 698.4  | 3        | (-)SYSMEHFRWGKPVGKKR(R)     |
| 20                  | 771.4  | 1        | (R)WGKPVGK(K)               |
| 21                  | 858.5  | 3        | (-)SYSMEHFRWGKPVGKKRRPVK(V) |
| 22                  | 904.9  | 2        | (-)SYSMEHFRWGKPVGK(K)       |
| 23                  | 948.1  | 2        | (R)WGKPVGKKRRPVKVYP(-)      |
| 24                  | 968.9  | 2        | (-)SYSMEHFRWGKPVGKK(R)      |
| 25                  | 1047.0 | 2        | (-)SYSMEHFRWGKPVGKKR(R)     |
| 26                  | 1056.4 | 1        | (-)SYSMEHFR(W)              |

**Note:** “-” means the sequence terminus.

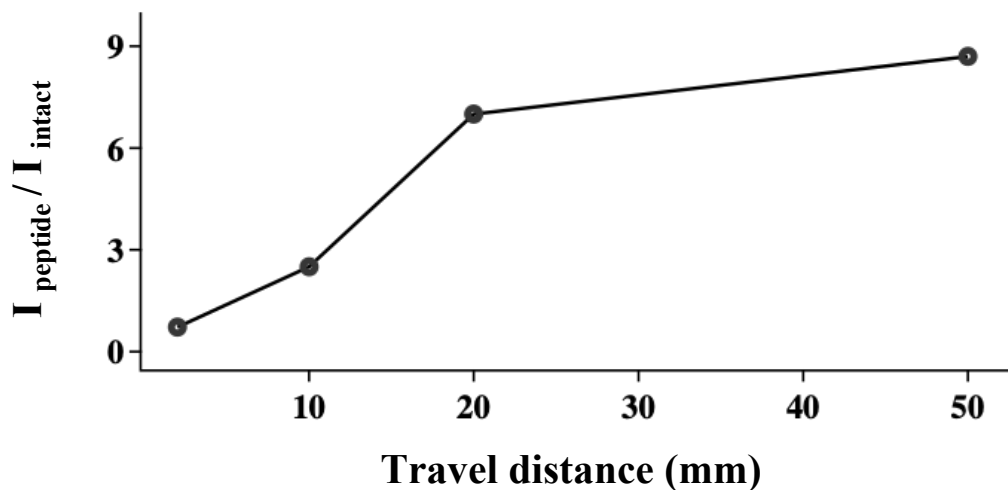

**Supplementary Figure 2:** Variation with microdroplet travel distance between the sprayer tip and the MS inlet of the intensity ratio of a chosen peptide at  $m/z$  632.4, marked in pink in Fig. 2, to the sum of the intensities of all peaks from intact multicharged ACTH.

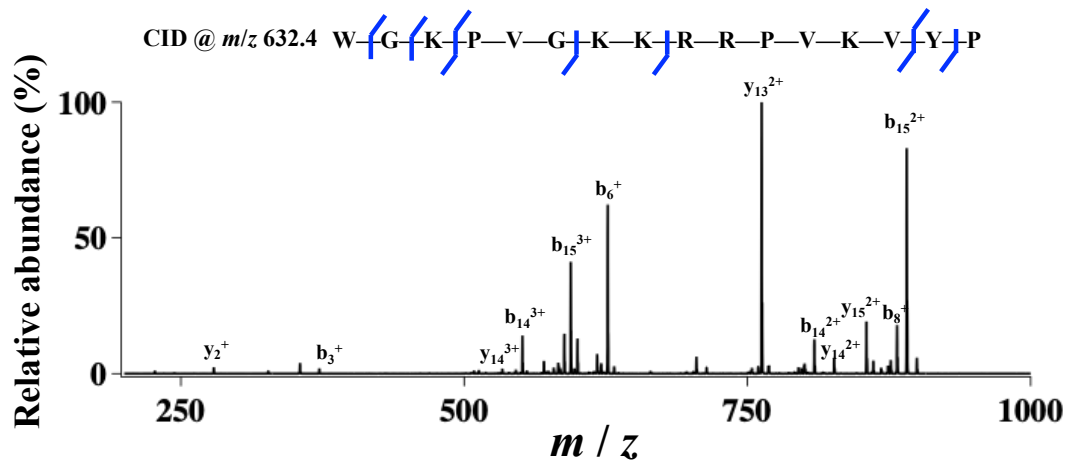

**Supplementary Figure 3:** Tandem MS-CID spectrum of the peptide ion at  $m/z$  632.4 from the digest of 10- $\mu$ M ACTH in 5-mM  $\text{NH}_4\text{HCO}_3$  by ESSI-MS under a positive ion mode with a normalized energy of 25 arbitrary manufacturer's units and the mass isolation width of 1  $m/z$ . Blue lines denote the CID fragment sites.

**Supplementary Table 2:** 16 peptide peaks found with the commercial ESI-MS from bulk-phase digestion of human ACTH (1-24) for 3 h at 37°C.

| <b>Observed <math>m/z</math></b> |       | <b><math>z</math></b> | <b>Peptide sequence</b> |
|----------------------------------|-------|-----------------------|-------------------------|
| No. 1                            | 261.8 | 3                     | (K)KRRPVK(V)            |
| 2                                | 300.5 | 3                     | (R)WGKPVGKK(R)          |
| 3                                | 338.8 | 3                     | (K)RRPVKVYP(-)          |
| 4                                | 352.5 | 3                     | (-)SYSMEHFR(W)          |
| 5                                | 380.0 | 5                     | (R)WGKPVGKKRRPVKVYP(-)  |
| 6                                | 381.5 | 3                     | (K)KRRPVKVYP(-)         |
| 7                                | 386.2 | 2                     | (R)WGKPVGK(K)           |
| 8                                | 429.7 | 2                     | (R)RPVKVYP(-)           |
| 9                                | 450.2 | 2                     | (R)WGKPVGKK(R)          |
| 10                               | 474.5 | 4                     | (R)WGKPVGKKRRPVKVYP(-)  |
| 11                               | 507.8 | 2                     | (K)RRPVKVYP(-)          |
| 12                               | 528.7 | 2                     | (R)WGKPVGKKR(R)         |
| 13                               | 571.8 | 2                     | (K)KRRPVKVYP(-)         |
| 14                               | 632.4 | 3                     | (R)WGKPVGKKRRPVKVYP(-)  |
| 15                               | 646.3 | 3                     | (-)SYSMEHFRWGKPVGKK(R)  |
| 16                               | 948.1 | 2                     | (R)WGKPVGKKRRPVKVYP(-)  |

**Note:** “-” means the sequence terminus.

**Supplementary Table 3:** Peptides identified from digests of myoglobin by ESSI-MS or in bulk solution followed by the commercial ESI-MS detection with a positive voltage (+3 kV).

| Observed peaks, <i>m/z</i> , Th |                              | Charge state, <i>z</i> | Molecular weight, Da | Peptide sequence                       |
|---------------------------------|------------------------------|------------------------|----------------------|----------------------------------------|
| Microdroplet RT, < 1 ms         | Bulk solution 37°C overnight |                        |                      |                                        |
| -                               | 368.2                        | 2                      | 734.4                | (K)HKIPIK(Y)                           |
| 423.0                           | -                            | 5                      | 2110                 | (K)KKGHHEAELKPLAQSHATK(H)              |
| 496.5                           | -                            | 4                      | 1982                 | (K)KKGHHEAELKPLAQSHATK(H)              |
| 502.9                           | -                            | 3                      | 1505.7               | (K)KHGTVVLTALGGILK(K)                  |
| 528.5                           | -                            | 4                      | 2110                 | (K)KKGHHEAELKPLAQSHATK(H)              |
| -                               | 531.8                        | 2                      | 1061.6               | (K)FDKFKHLK(T)                         |
| 543.7                           | 543.7                        | 2                      | 1085.4               | (K)HLKTEAEMK(A)                        |
| 551.7                           | -                            | 2                      | 1101.4               | (K)HLKTEAEM <sup>o</sup> K(A)          |
| 618.6                           | 618.6                        | 3                      | 1852.8               | (K)GHHEAELKPLAQSHATK(H)                |
| 636.3                           | 636.3                        | 2                      | 1270.6               | (R)LFTGHPETLEK(F)                      |
| 646.6                           | -                            | 3                      | 1936.8               | (R)LFTGHPETLEKFDKFK(H)                 |
| 661.7                           | -                            | 3                      | 1982.1               | (K)KKGHHEAELKPLAQSHATK(H)              |
| 669.0                           | -                            | 3                      | 2004                 | (K)FKHLKTEAEMKASEDLK(K)                |
| 674.3                           | -                            | 3                      | 2019.9               | (K)FKHLKTEAEM <sup>o</sup> KASEDLK(K)  |
| 680.9                           | 680.9                        | 2                      | 1359.8               | (K)ALELFRNDIAAK(Y)                     |
| -                               | 684.3                        | 1                      | 683.3                | (K)FDKFK(H)                            |
| 689.9                           | 689.9                        | 2                      | 1377.8               | (K)HGTVVLTALGGILK(K)                   |
| 704.3                           | -                            | 3                      | 2109.9               | (K)KKGHHEAELKPLAQSHATK(H)              |
| 717.7                           | -                            | 3                      | 2150.1               | (K)ASEDLKKGTVVLTALGGILK(K)             |
| 735.5                           | 735.5                        | 1                      | 734.5                | (K)HKIPIK(Y)                           |
| 748.4                           | 748.4                        | 1                      | 747.4                | (K)ALELFR(N)                           |
| 752.4                           | -                            | 4                      | 3005.6               | (R)LFTGHPETLEKFDKFKHLKTEAEMK(A)        |
| 753.9                           | 753.9                        | 2                      | 1505.8               | (K)KHGTVVLTALGGILK(K)                  |
| 760.4                           | 760.4                        | 2                      | 1518.8               | (K)HPGDFGADAQGAM <sup>o</sup> TK(A)    |
| 762.0                           | -                            | 3                      | 2283                 | (K)ALELFRNDIAAKYKELGFQG(I)             |
| 805.4                           | -                            | 4                      | 3217.6               | (K)HLKTEAEMKASEDLKKGTVVLTALGGILK(K)    |
| 826.4                           | 826.4                        | 2                      | 1650.8               | (K)ALELFRNDIAAKYK(E)                   |
| 927.4                           | 927.4                        | 2                      | 1852.8               | (K)GHHEAELKPLAQSHATK(H)                |
| 945.2                           | -                            | 4                      | 3776.8               | (R)LFTGHPETLEKFDKFKHLKTEAEMKASEDLK(H)  |
| 969.5                           | -                            | 2                      | 1937                 | (R)LFTGHPETLEKFDKFK(H)                 |
| 991.5                           | -                            | 2                      | 1981                 | (K)KKGHHEAELKPLAQSHATK(H)              |
| 1002.5                          | -                            | 3                      | 3004.5               | (R)LFTGHPETLEKFDKFKHLKTEAEMK(A)        |
| 1135.5                          | -                            | 3                      | 3403.5               | (- )MGLSDGEWQQVLNVWGKVEADIAGHGQEVLR(L) |
| -                               | 1378.8                       | 1                      | 1377.8               | (K)HGTVVLTALGGILK(K)                   |

**Note:** “-” means the sequence terminus.

**Supplementary Table 4:** Peptides identified from digests of myoglobin by ESSI-MS applied with a negative voltage (-3 kV). The blue vertical lines indicate cleavage sites.

MGLSDGEWQQVLNVWGK|VEADIAGHGQEVLR|LFTGHPETLEK|FDKFK|HLK|TEAE  
 MKASEDLK|KHGTVVLTALGGILKK|KGHHEAELKPLAQSHATK|HK|IPIK|YLEFISDAII  
 HVLHSH|HPGDFGADAQGAMTK|ALELFRNDIAAK|YK|ELGFQG

| Observed peaks, <i>m/z</i> , Th | Charge state, <i>z</i> | Molecular weight, Da | Peptide sequence                                           |
|---------------------------------|------------------------|----------------------|------------------------------------------------------------|
| 315.1                           | 2                      | 632.2                | (R)NDIAAK(Y)                                               |
| 323.6                           | 2                      | 649.2                | (K)ELGFQG(-)                                               |
| 352.6                           | 2                      | 707.2                | (K)TEAEMK(A)                                               |
| 372.7                           | 2                      | 747.4                | (K)ALELFR(N)                                               |
| 393.7                           | 2                      | 789.4                | (K)ASEDLKK(H)                                              |
| 395.2                           | 1                      | 396.2                | (K)HLK(T)                                                  |
| 407.2                           | 1                      | 408.2                | (K)FDK(F)                                                  |
| 423.2                           | 3                      | 1272.6               | (R)LFTGHPETLEK(F)                                          |
| 449.2                           | 3                      | 1350.6               | (K)TEAEMKASEDLK(K)                                         |
| 468.3                           | 1                      | 469.3                | (K)IPIK(Y)                                                 |
| 504.8                           | 3                      | 1517.4               | (K)HPGDFGADAQGAM <sup>ox</sup> TK(A)                       |
| 529.8                           | 2                      | 1061.6               | (K)FDKFKHLK(T)                                             |
| 541.8                           | 2                      | 1085.6               | (K)HLKTEAEMK(A)                                            |
| 629.3                           | 1                      | 630.3                | (R)NDIAAK(Y)                                               |
| 634.3                           | 2                      | 1270.6               | (R)LFTGHPETLEK(F)                                          |
| 648.3                           | 1                      | 649.3                | (K)ELGFQG(-)                                               |
| 660.3                           | 1                      | 661.3                | (K)ASEDLK(K)                                               |
| 674.3                           | 2                      | 1350.6               | (K)TEAEMKASEDLK(K)                                         |
| 678.8                           | 2                      | 1359.6               | (K)ALELFRNDIAAK(Y)                                         |
| 682.3                           | 1                      | 683.3                | (K)FDKFK(H)                                                |
| 687.9                           | 2                      | 1377.8               | (K)HGTVVLTALGGILK(K)                                       |
| 733.4                           | 1                      | 734.4                | (K)HKIPIK(Y)                                               |
| 746.4                           | 1                      | 747.4                | (K)ALELFR(N)                                               |
| 749.8                           | 2                      | 1501.6               | (K)HPGDFGADAQGAMTK(A)                                      |
| 752.3                           | 2                      | 1505.6               | (K)KHGTVVLTALGGILK(K)                                      |
| 757.3                           | 2                      | 1516.6               | (K)HPGDFGADAQGAM <sup>ox</sup> TK(A)                       |
| 775.3                           | 2                      | 1552.6               | (R)NDIAAKYKELGFQG(-)                                       |
| 788.4                           | 1                      | 789.4                | (K)ASEDLKK(H)                                              |
| 801.9                           | 2                      | 1605.8               | (K)VEADIAGHGQEVLR(L)                                       |
| 816.4                           | 2                      | 1634.8               | (K)HGTVVLTALGGILKKK(G)                                     |
| 824.4                           | 2                      | 1650.8               | (K)ALELFRNDIAAKYK(E)                                       |
| 829.4                           | 2                      | 1660.8               | (R)LFTGHPETLEKFDK(F)                                       |
| 849.9                           | 4                      | 3403.6               | (-)MGLSDGEWQQVLNVWGKVEADIAGHGQEVLR(L)                      |
| 906.4                           | 2                      | 1814.8               | (-)M <sup>Met-loss</sup> GLSDGEWQQVLNVWGK(V)               |
| 925.4                           | 2                      | 1852.8               | (K)KGHHEAELKPLAQSHATK(H)                                   |
| 927.4                           | 2                      | 1856.8               | (K)HLKTEAEMKASEDLKK(H)                                     |
| 939.4                           | 1                      | 940.4                | (K)YKELGFQG(-)                                             |
| 967.0                           | 2                      | 1936                 | (R)LFTGHPETLEKFDKFK(H)                                     |
| 971.9                           | 2                      | 1945.8               | (-)MGLSDGEWQQVLNVWGK(V)                                    |
| 989.5                           | 2                      | 1981                 | (K)KGHHEAELKPLAQSHATK(H)                                   |
| 1001.0                          | 2                      | 2004                 | (K)FKHLKTEAEMKASEDLK(K)                                    |
| 1060.6                          | 1                      | 1061.6               | (K)FDKFKHLK(T)                                             |
| 1073.6                          | 2                      | 2149.2               | (K)ASEDLKKHGTVVLTALGGILK(K)                                |
| 1076.8                          | 3                      | 3233.4               | (K)HLKTEAEM <sup>ox</sup> KASEDLKKHGTVVLTALGGILK(K)        |
| 1084.5                          | 1                      | 1085.5               | (K)HLKTEAEMK(A)                                            |
| 1121.5                          | 3                      | 3367.5               | (K)YLEFISDAIIHVLHSHKHPGDFGADAQGAMTK(A)                     |
| 1133.5                          | 3                      | 3403.5               | (-)M <sup>Met-loss</sup> GLSDGEWQQVLNVWGKVEADIAGHGQEVLR(L) |
| 1140.1                          | 2                      | 2282.2               | (K)ALELFRNDIAAKYKELGFQG(-)                                 |
| 1269.6                          | 1                      | 1270.6               | (R)LFTGHPETLEK(F)                                          |
| 1358.7                          | 1                      | 1359.7               | (K)ALELFRNDIAAK(Y)                                         |
| 1376.8                          | 1                      | 1377.8               | (K)HGTVVLTALGGILK(K)                                       |
| 1500.6                          | 1                      | 1501.6               | (K)HPGDFGADAQGAMTK(A)                                      |
| 1504.9                          | 1                      | 1505.9               | (K)KHGTVVLTALGGILK(K)                                      |
| 1551.7                          | 1                      | 1552.7               | (R)NDIAAKYKELGFQG(-)                                       |
| 1700.8                          | 2                      | 3403.6               | (-)MGLSDGEWQQVLNVWGKVEADIAGHGQEVLR(L)                      |

**Note:** “-” means the sequence terminus.



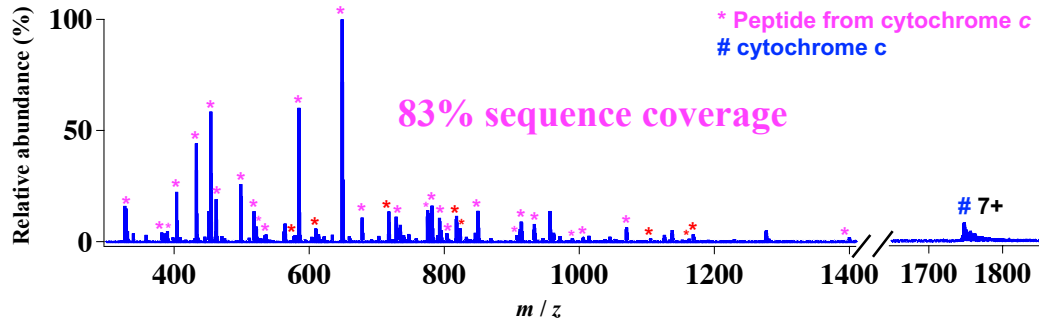

**Supplementary Figure 4:** Mass spectrum of peptides identified from digests of cytochrome *c* by ESSI-MS applied with a positive voltage (+3 kV). Magenta asterisks denote the peptide fragments. Blue #s mark undigested cytochrome *c* peaks.

**Supplementary Table 5:** Peptide list identified from digests of cytochrome *c* by ESSI-MS applied with a positive voltage (+3 kV).

| Observed $m/z$ | $z$ | Peptide sequence                          |
|----------------|-----|-------------------------------------------|
| No. 1   339.7  | 2   | (-)MGDVEK(G)                              |
| 2   381.7      | 2   | (K)KIFVQK(C)                              |
| 3   390.7      | 2   | (K)MIFAGIK(K)                             |
| 4   403.7      | 2   | (K)KYIPGTK(M)                             |
| 5   432.9      | 3   | (K)TGPNLHGLFGRK(T)                        |
| 6   454.2      | 2   | (K)MIFAGIKK(K)                            |
| 7   478.9      | 3   | (K)KGEREDLIAYLK(K)                        |
| 8   486.2      | 3   | (K)TGQAPGFSYTDANK(N)                      |
| 9   518.3      | 2   | (K)MIFAGIKKK(G)                           |
| 10   521.6     | 3   | (K)KGEREDLIAYLK(K)                        |
| 11   584.8     | 2   | (K)TGPNLHGLFGR(K)                         |
| 12   613.6     | 4   | (K)NKGITWKEETLMEYLENPKK(Y)                |
| 13   648.8     | 2   | (K)TGPNLHGLFGRK(T)                        |
| 14   678.3     | 1   | (K)YIPGTK(M)                              |
| 15   717.9     | 4   | (K)GITWKEETLMEYLENPKKYIPGTK(M)            |
| 16   728.8     | 2   | (K)TGQAPGFSYTDANK(N)                      |
| 17   779.4     | 1   | (K)MIFAGIK(K)                             |
| 18   781.9     | 2   | (K)KGEREDLIAYLKK(A)                       |
| 19   792.9     | 2   | (R)KTGQAPGFSYTDANK(N)                     |
| 20   803.9     | 2   | (-)MGDVEKGGKIFVQK(C)                      |
| 21   818.1     | 3   | (K)NKGITWKEETLMEYLENPKK(Y)                |
| 22   823.4     | 3   | (K)NKGITWKEETLM <sup>0x</sup> EYLENPKK(Y) |
| 23   849.9     | 2   | (K)TGQAPGFSYTDANKNK(G)                    |
| 24   912.5     | 3   | (K)TGPNLHGLFGRKTGQAPGFSYTDANK(N)          |
| 25   913.9     | 2   | (R)KTGQAPGFSYTDANKNK(G)                   |
| 26   933.5     | 3   | (K)GITWGEETLMEYLENPKKYIPGTK(M)            |
| 27   993.2     | 3   | (K)TGPNLHGLFGRKTGQAPGFSYTDANKNK(G)        |
| 28   1005.4    | 2   | (K)GITWGEETLMEYLENPK(K)                   |
| 29   1014.2    | 3   | (K)NKGITWGEETLMEYLENPKKYIPGTK(M)          |
| 30   1070      | 2   | (K)GITWGEETLMEYLENPKK(Y)                  |
| 31   1162.6    | 2   | (K)NKGITWKEETLMEYLENPK(K)                 |
| 32   1168.6    | 1   | (K)TGPNLHGLFGR(K)                         |
| 33   1399.7    | 2   | (K)GITWGEETLMEYLENPKKYIPGTK(M)            |

**Note:** “-” means the sequence terminus.

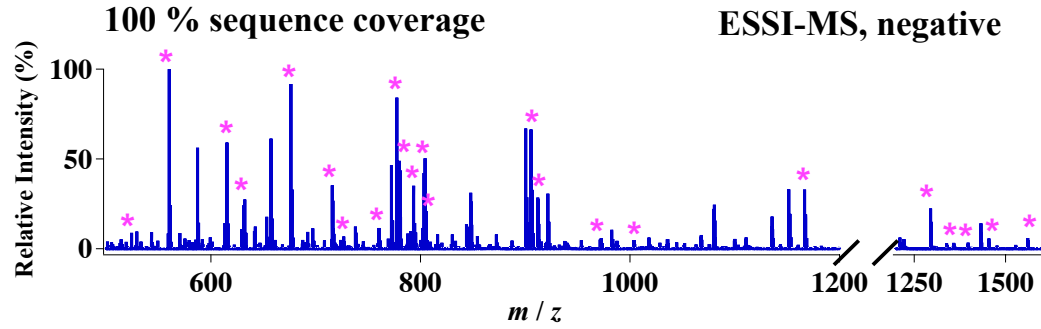

**Supplementary Figure 5:** Mass spectrum of peptides identified from digests of cytochrome *c* by ESSI-MS applied with a negative voltage (-3 kV). Magenta asterisks denote the peptide fragments.

**Supplementary Table 6:** Peptide list identified from digests of cytochrome *c* by ESSI-MS applied with a negative voltage (-3 kV).

| <b>m/z</b> | <b>z</b> | <b>Mw</b> | <b>sequence</b>                |
|------------|----------|-----------|--------------------------------|
| 524.3      | 1        | 525.3     | (K)GGKHK(T)                    |
| 560.27     | 1        | 561.27    | (K)KATNE()                     |
| 615.31     | 1        | 616.31    | (K)KKGER(E)                    |
| 632.38     | 1        | 633.38    | (K)IFVQK(C)                    |
| 676.37     | 1        | 677.37    | (K)YIPGTK(M)                   |
| 715.89     | 2        | 1433.78   | (K)GEREDLIAYLKK(A)             |
| 726.83     | 2        | 1455.66   | (K)TGQAPGFSYTDANK(N)           |
| 760.47     | 1        | 761.47    | (K)KIFVQK(C)                   |
| 777.44     | 1        | 778.44    | (K)MIFAGIK(K)                  |
| 779.94     | 2        | 1561.88   | (K)KGEREDLIAYLKK(A)            |
| 790.87     | 2        | 1583.74   | (R)KTGQAPGFSYTDANK(N)          |
| 801.95     | 2        | 1605.9    | (-)MGDVEKGKKIFVQK(C)           |
| 804.46     | 1        | 805.46    | (K)KYIPGTK(M)                  |
| 847.89     | 2        | 1697.78   | (K)TGQAPGFSYTDANKNK(G)         |
| 905.53     | 1        | 906.53    | (K)MIFAGIKK(K)                 |
| 911.94     | 2        | 1825.88   | (R)KTGQAPGFSYTDANKNK(G)        |
| 972.49     | 2        | 1946.98   | (K)GKKIFVQKCAQCHTVEK(G)        |
| 1003.47    | 2        | 2008.94   | (K)GITWGEETLMEYLENPK(K)        |
| 1166.61    | 1        | 1167.61   | (K)TGPNLHGLFGR(K)              |
| 1294.7     | 1        | 1295.7    | (K)TGPNLHGLFGRK(T)             |
| 1304.69    | 1        | 1305.69   | (K)GEREDLIAYLK(K)              |
| 1397.69    | 2        | 2797.38   | (K)GITWGEETLMEYLENPKKYIPGTK(M) |
| 1454.66    | 1        | 1455.66   | (K)TGQAPGFSYTDANK(N)           |
| 1560.88    | 1        | 1561.88   | (K)KKGEREDLIAYLK(K)            |
| 1696.8     | 1        | 1697.8    | (K)TGQAPGFSYTDANKNK(G)         |
| 1944.01    | 1        | 1945.01   | (K)GKKIFVQKCAQCHTVEK(G)        |

**Note:** “-” means the sequence terminus.

**Supplementary Table 7:** Peptide list identified from digests of cytochrome *c* and  $\alpha$ -casein extracted from an SDS-PAGE gel by ESSI-MS applied with a positive voltage (+3 kV).

**Cytochrome *c* from gel: 99% sequence coverage**

| Observed peaks, <i>m/z</i> , Th | Charge state, <i>z</i> | Peptide sequence                    |
|---------------------------------|------------------------|-------------------------------------|
| 453.7                           | 2                      | (K)MIFAGIKK(K)                      |
| 462.2                           | 2                      | (K)M <sup>ox</sup> IFAGIKK(K)       |
| 482.2                           | 2                      | (R)EDLIAYLK(K)                      |
| 489.3                           | 1                      | (K)KGER(E)                          |
| 504.3                           | 2                      | (-)MGDVEKGKK(I)                     |
| 518.2                           | 2                      | (K)MIFAGIKKK(G)                     |
| 528.9                           | 3                      | (R)KTGQAPGFSYTDANK(N)               |
| 536.1                           | 4                      | (K)IFVQKCAQCHTVEKGGKHK(T)           |
| 562.2                           | 1                      | (K)KATNE(-)                         |
| 566.9                           | 3                      | (K)TGQAPGFSYTDANKNK(G)              |
| 584.8                           | 2                      | (K)TGPNLHGLFGR(K)                   |
| 631.3                           | 2                      | (K)CAQCHTVEKGGK(H)                  |
| 634.3                           | 1                      | (K)IFVQK(C)                         |
| 678.3                           | 1                      | (K)YIPGTK(M)                        |
| 717.9                           | 2                      | (K)GEREDLIAYLKK(A)                  |
| 728.8                           | 2                      | (K)TGQAPGFSYTDANK(N)                |
| 756.8                           | 3                      | (K)NKGITWGEETLMEYLENPK(K)           |
| 792.8                           | 2                      | (R)KTGQAPGFSYTDANK(N)               |
| 803.8                           | 2                      | (-)MGDVEKGKKIFVQK(C)                |
| 812.4                           | 2                      | (-)M <sup>ox</sup> GDVEKGKKIFVQK(C) |
| 849.9                           | 2                      | (K)TGQAPGFSYTDANKNK(G)              |

**Note:** “-” means the sequence terminus.

**$\alpha$ S1-casein from gel: 90.3% sequence coverage**

| Observed peaks, <i>m/z</i> , Th | Charge state, <i>z</i> | Peptide sequence                                 |
|---------------------------------|------------------------|--------------------------------------------------|
| 278.1                           | 1                      | (-)MK(L)                                         |
| 382.7                           | 2                      | (K)TMPLW(-)                                      |
| 388.2                           | 1                      | (R)LKK(Y)                                        |
| 446.5                           | 3                      | (K)HIQKEDVPSER(Y)                                |
| 455.7                           | 2                      | (K)EGIHAAQK(E)                                   |
| 473.7                           | 2                      | (K)EKNELSK(D)                                    |
| 517.2                           | 2                      | (K)NRLNFLKK(I)                                   |
| 547.9                           | 3                      | (R)FFVAPFPEVFGKEK(V)                             |
| 576.4                           | 1                      | (K)HYQK(A)                                       |
| 587.3                           | 3                      | (K)TVDMESTEVFTKTK(L)                             |
| 605.9                           | 3                      | (-)MKFFIFTCLLAVALAK(N)                           |
| 634.3                           | 2                      | (R)YLGYLEQLLR(L)                                 |
| 651.6                           | 3                      | (-)MKLLILTCLVAVALARPK(H)                         |
| 680.4                           | 1                      | (R)LKKYK(V)                                      |
| 692.8                           | 2                      | (R)FFVAPFPEVFGK(E)                               |
| 747.3                           | 3                      | (R)LKKYKVPQLEIVPNSAEER(L)                        |
| 748.3                           | 1                      | (K)TMPLW()                                       |
| 773                             | 3                      | (K)EPMIGVNQELAYFYPELFR(Q)                        |
| 778.3                           | 3                      | (K)EPM <sup>ox</sup> IGVNQELAYFYPELFR(Q)         |
| 780                             | 3                      | (K)QMEAESISSSEEIVPNSVEQK(H)                      |
| 784                             | 3                      | (K)AMKPWIQPKTKVIPYVRYL(-)                        |
| 787.2                           | 6                      | (R)QFYQLDAYPSGAWYYVPLGTQYTDAPSFSDIPNPIGSENSEK(T) |
| 803.1                           | 4                      | (K)EGIHAAQKEPMIGVNQELAYFYPELFR(Q)                |
| 806.9                           | 4                      | (K)EGIHAAQKEPM <sup>ox</sup> IGVNQELAYFYPELFR(Q) |
| 821.9                           | 2                      | (R)FFVAPFPEVFGKEK(V)                             |
| 830.9                           | 2                      | (K)KTVDMESTEVFTK(T)                              |
| 880.4                           | 2                      | (K)TVDMESTEVFTKTK(L)                             |
| 908.4                           | 2                      | (-)MKFFIFTCLLAVALAK(N)                           |
| 944.2                           | 5                      | (R)QFYQLDAYPSGAWYYVPLGTQYTDAPSFSDIPNPIGSENSEK(T) |
| 976.9                           | 2                      | (-)MKLLILTCLVAVALARPK(H)                         |
| 1070                            | 3                      | (K)EGIHAAQKEPMIGVNQELAYFYPELFR(Q)                |
| 1089.1                          | 2                      | (K)VPQLEIVPNSAEERLHSMK(E)                        |
| 1159                            | 2                      | (K)EPMIGVNQELAYFYPELFR(Q)                        |
| 1180.3                          | 4                      | (R)QFYQLDAYPSGAWYYVPLGTQYTDAPSFSDIPNPIGSENSEK(T) |

**Note:** “-” means the sequence terminus.

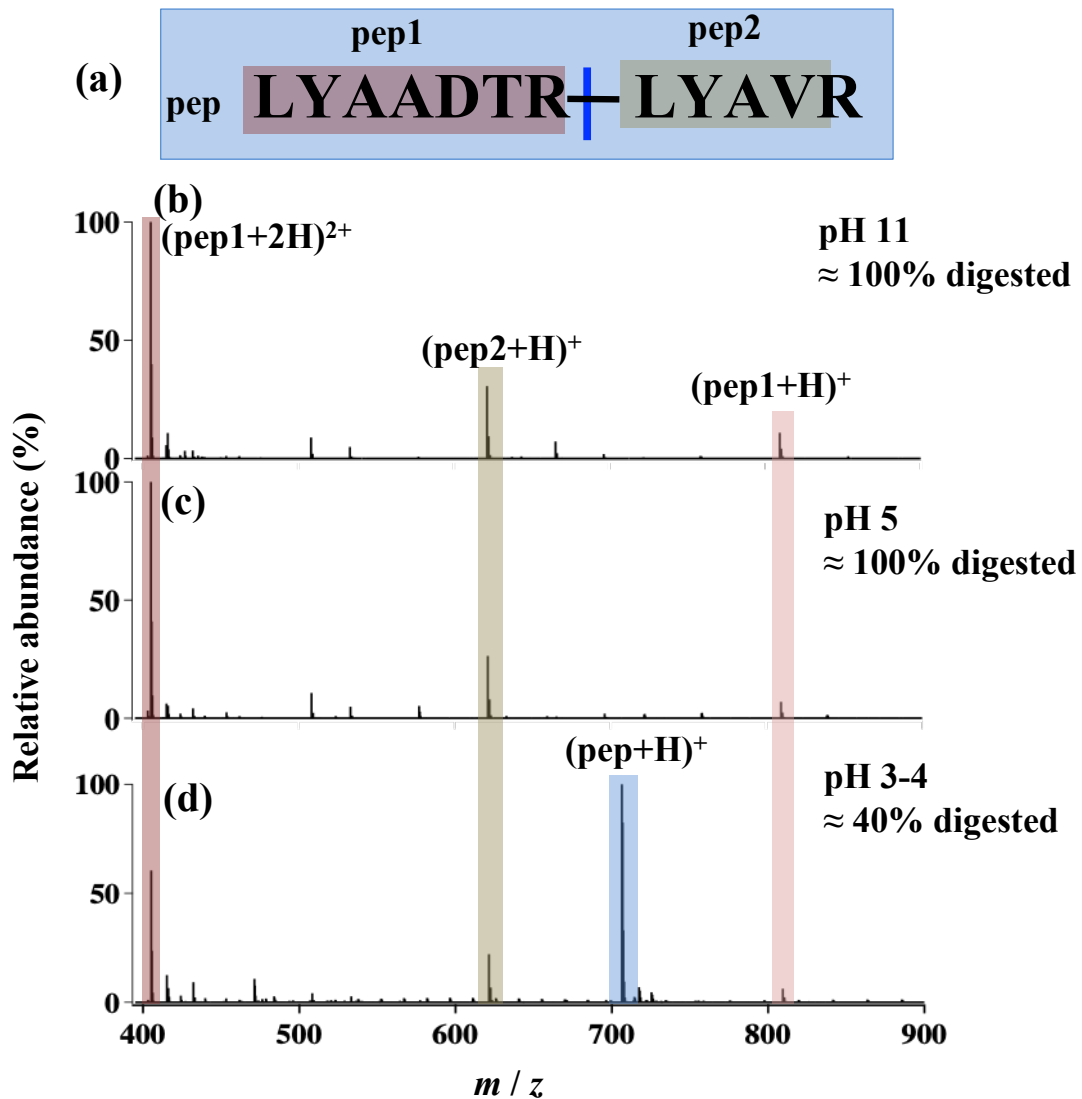

**Supplementary Figure 6:** Mass spectra of the digest of a synthetic peptide in 5-mM  $\text{NH}_4\text{HCO}_3$  with different pH values by ESSI-MS: (a) peptide sequence, (b) pH 11, (c) pH 5, and (d) pH 3-4. A positive voltage (+3 kV) was applied. The blue line in the sequence marked the fragment site. The rectangles marked in various colors denote the synthetic peptide and its two fragments.

**Supplementary Table 8:** Peptide list identified from tryptic digests of the therapeutic antibody of trastuzumab by ESSI-MS applied with a negative voltage (-3 kV).

**Light chain, 100% sequence coverage**

| <b>m/z</b> | <b>z</b> | <b>sequence</b>                                | <b>modification</b> |
|------------|----------|------------------------------------------------|---------------------|
| 365.17     | 1        | (R)GEC(-)                                      | Carbamidomethyl     |
| 486.3      | 1        | (K)VEIK(R)                                     |                     |
| 521.25     | 1        | (K)SFNR(G)                                     |                     |
| 551.26     | 1        | (R)FSGSR(S)                                    |                     |
| 558.31     | 1        | (K)VQWK(V)                                     |                     |
| 623.27     | 1        | (K)ADYEK(H)                                    |                     |
| 642.4      | 1        | (K)VEIKR(T)                                    |                     |
| 690.42     | 1        | (R)VTITCR(A)                                   |                     |
| 710.65     | 3        | (K)VDNALQSGNSQESVTEQDSK(D)                     |                     |
| 747.39     | 1        | (R)VTITCR(A)                                   | Carbamidomethyl     |
| 749.87     | 2        | (K)DSTYLSSTLTLSK(A)                            |                     |
| 810.35     | 1        | (K)SFNRGEC(-)                                  |                     |
| 867.35     | 1        | (K)SFNRGEC(-)                                  | Carbamidomethyl     |
| 885.47     | 2        | (K)LLIYSASFLYSGVPSR(F)                         |                     |
| 888.43     | 1        | (K)ADYEKHK(V)                                  | Carbamidomethyl     |
| 897.44     | 2        | (K)SGTASVVCLLNNFYPR(E)                         | Carbamidomethyl     |
| 936.46     | 2        | (K)VYACEVTHQGLSSPVTK(S)                        | Carbamidomethyl     |
| 945.94     | 2        | (-)DIQMTQSPSLSASVGDR(V)                        | Oxidation           |
| 972.01     | 2        | (R)TVAAPSVFIFPPSDEQLK(S)                       |                     |
| 994.5      | 2        | (R)ASQDVNTAVAWYQQKPGK(A)                       |                     |
| 1050.06    | 2        | (K)RTVAAPSVFIFPPSDEQLK(S)                      |                     |
| 1061.55    | 2        | (K)SGTASVVCLLNNFYPREAK(V)                      | Carbamidomethyl     |
| 1066.98    | 2        | (K)VDNALQSGNSQESVTEQDSK(D)                     |                     |
| 1142.59    | 2        | (R)ASQDVNTAVAWYQQKPGKAPK(L)                    |                     |
| 1152.57    | 2        | (K)LLIYSASFLYSGVPSRFSGSR(S)                    |                     |
| 1205.57    | 3        | (K)VDNALQSGNSQESVTEQDSKDSTYLSSTLTLSK(A)        |                     |
| 1322.61    | 2        | (K)HKVYACEVTHQGLSSPVTKSFNR(G)                  | Carbamidomethyl     |
| 1332.65    | 2        | (K)SGTASVVCLLNNFYPREAKVQWK(V)                  | Carbamidomethyl     |
| 1337.63    | 2        | (K)VQWKVDNALQSGNSQESVTEQDSK(D)                 |                     |
| 1363.14    | 2        | (K)VYACEVTHQGLSSPVTKSFNRGEC(-)                 | Carbamidomethyl     |
| 1386.34    | 3        | (K)VQWKVDNALQSGNSQESVTEQDSKDSTYLSSTLTLSK(A)    |                     |
| 1394.97    | 3        | (R)SGTDFTLTISSLPEDFATYYCQQHYTPPTFGQGTK(V)      | Carbamidomethyl     |
| 1500.75    | 1        | (K)DSTYLSSTLTLSK(A)                            |                     |
| 1603.44    | 3        | (R)SGTDFTLTISSLPEDFATYYCQQHYTPPTFGQGTKVEIKR(T) | Carbamidomethyl     |
| 1795.9     | 1        | (K)SGTASVVCLLNNFYPR(E)                         | Carbamidomethyl     |
| 1809.36    | 2        | (K)VDNALQSGNSQESVTEQDSKDSTYLSSTLTLSK(A)        |                     |
| 1860.96    | 2        | (R)TVAAPSVFIFPPSDEQLKSGTASVVCLLNNFYPR(E)       | Carbamidomethyl     |
| 1873.93    | 1        | (K)VYACEVTHQGLSSPVTK(S)                        | Carbamidomethyl     |
| 1944.03    | 1        | (R)TVAAPSVFIFPPSDEQLK(S)                       |                     |
| 2093.47    | 2        | (R)SGTDFTLTISSLPEDFATYYCQQHYTPPTFGQGTK(V)      | Carbamidomethyl     |

**Note:** “-” means the sequence terminus.

## Heavy chain, 86% sequence coverage

| m/z     | z | sequence                             | modification                |
|---------|---|--------------------------------------|-----------------------------|
| 359.2   | 1 | (K)VDK(K)                            |                             |
| 437.21  | 1 | (K)EYK(C)                            |                             |
| 445.24  | 1 | (K)VSNK(A)                           |                             |
| 446.27  | 1 | (K)TISK(A)                           |                             |
| 455.24  | 1 | (K)GQPR(E)                           |                             |
| 470.27  | 1 | (K)VEPK(S)                           |                             |
| 487.29  | 1 | (K)VDDK(V)                           |                             |
| 498.27  | 1 | (R)QAPGK(G)                          |                             |
| 499.3   | 1 | (K)TKPR(E)                           |                             |
| 573.33  | 1 | (K)LTVDK(S)                          |                             |
| 598.36  | 1 | (K)KVEPK(S)                          |                             |
| 623.3   | 3 | (K)TPPVLDSDGSFFLYSK(L)               |                             |
| 626     | 3 | (-)EVQLVESGGGLVQPGGSLR(L)            |                             |
| 634.78  | 4 | (K)GFYPSDIAVEWESNGQPENNYK(T)         |                             |
| 635.3   | 1 | (R)EEMTK(N)                          |                             |
| 640.33  | 3 | (K)AKGQPREPQVYTLPPSR(E)              |                             |
| 641.83  | 2 | (R)EPQVYTLPPSR(E)                    |                             |
| 645.39  | 1 | (K)TISKAK(G)                         |                             |
| 654.37  | 2 | (R)QAPGKLEWVAR(I)                    |                             |
| 662.32  | 2 | (K)NTAYLQMNSLR(A)                    | Oxidation                   |
| 665.78  | 2 | (R)AEDTAVYYCSR(W)                    | Carbamidomethyl             |
| 680.33  | 1 | (R)YADSVK(G)                         |                             |
| 712.01  | 3 | (R)TPEVTCVVVDVSHEDPEVK(F)            | Carbamidomethyl             |
| 786.42  | 1 | (K)SLSLSPGK(-)                       |                             |
| 816.46  | 1 | (K)LTVDKSR(W)                        |                             |
| 828.44  | 1 | (K)GLEWVAR(I)                        |                             |
| 836.49  | 1 | (K)ALPAIEK(T)                        |                             |
| 848.39  | 2 | (K)VSNKALPAIEKTISK(A)                |                             |
| 847.04  | 3 | (K)GFYPSDIAVEWESNGQPENNYK(T)         |                             |
| 850.42  | 1 | (K)DTLMISR(T)                        |                             |
| 868.35  | 2 | (R)EEMTKNQVSLTCLVK(G)                | Oxidation                   |
| 898.43  | 2 | (R)EEMTKNQVSLTCLVK(G)                | Carbamidomethyl & Oxidation |
| 902.5   | 2 | (R)VVSVLTVLHQDWLNGK(E)               |                             |
| 935.46  | 2 | (K)TPPVLDSDGSFFLYSK(L)               |                             |
| 940     | 2 | (-)EVQLVESGGGLVQPGGSLR(L)            |                             |
| 961     | 2 | (K)AKGQPREPQVYTLPPSR(E)              |                             |
| 967     | 1 | (R)FTISADTSK(N)                      |                             |
| 979.98  | 2 | (R)IYPTNGYTRYADSVKGR(F)              |                             |
| 990.47  | 2 | (K)CKVSNKALPAIEKTISK(A)              | Carbamidomethyl             |
| 1031.51 | 1 | (K)KVEPKSCDK(T)                      |                             |
| 1068.51 | 2 | (R)TPEVTCVVVDVSHEDPEVK(F)            | Carbamidomethyl             |
| 1082.53 | 1 | (R)IYPTNGYTR(Y)                      |                             |
| 1087.54 | 1 | (K)DTYIHVVR(Q)                       |                             |
| 1089.54 | 2 | (R)LSCAASGFNIKDTYIHWVR(Q)            |                             |
| 1091    | 2 | (K)CKVSNKALPAIEKTISKAK(G)            | Carbamidomethyl             |
| 1088.54 | 1 | (K)KVEPKSCDK(T)                      | Carbamidomethyl             |
| 1113.1  | 2 | (R)VVSVLTVLHQDWLNGKEYK(C)            |                             |
| 1159.62 | 1 | (K)NQVSLTCLVK(G)                     | Carbamidomethyl             |
| 1165.58 | 1 | (R)LSCAASGFNIK(D)                    | Carbamidomethyl             |
| 1180.6  | 1 | (K)GRFTISADTSK(N)                    |                             |
| 1184.64 | 1 | (K)GPSVFLAPSSK(S)                    |                             |
| 1200.63 | 2 | (K)EYKCKVSNKALPAIEKTISK(A)           | Carbamidomethyl             |
| 1271.06 | 2 | (K)GFYPSDIAVEWESNGQPENNYK(T)         |                             |
| 1279.06 | 2 | (K)GLEWVARIYPTNGYTRYADSVK(G)         |                             |
| 1284.67 | 1 | (R)EPQVYTLPPSR(E)                    |                             |
| 1309.71 | 1 | (R)QAPGKLEWVAR(I)                    |                             |
| 1319.67 | 1 | (K)STSGGTAALGCLVK(D)                 | Carbamidomethyl             |
| 1325.64 | 1 | (K)NTAYLQMNSLR(A)                    | Oxidation                   |
| 1332.56 | 1 | (R)AEDTAVYYCSR(W)                    | Carbamidomethyl             |
| 1391.13 | 2 | (R)WGGDGFYAMDYWGQGLVTVSSASTK(G)      |                             |
| 1399.68 | 2 | (R)WQQGNVFSCVMHEALHNHYTQK(S)         | Carbamidomethyl             |
| 1420.64 | 2 | (K)THTCPPCPAPELGGPSVFLFPPKPK(D)      |                             |
| 1453.69 | 2 | (R)IYPTNGYTRYADSVKGRFTISADTSK(N)     |                             |
| 1566.74 | 2 | (R)YADSVKGRFTISADTSKNTAYLQMNSLR(A)   |                             |
| 1676.8  | 1 | (K)FNWYVDGVEVHNAK(T)                 |                             |
| 1697.78 | 2 | (R)EEQYNSTYRVVSVLTVLHQDWLNGKEYK(C)   |                             |
| 1763.37 | 2 | (R)WQQGNVFSCVMHEALHNHYTQKSLSLSPGK(-) | Oxidation                   |
| 1806    | 1 | (R)VVSVLTVLHQDWLNGK(E)               |                             |
| 1872.92 | 1 | (K)TPPVLDSDGSFFLYSK(L)               |                             |
| 1880.01 | 1 | (-)EVQLVESGGGLVQPGGSLR(L)            |                             |
| 1959.97 | 1 | (R)IYPTNGYTRYADSVKGR(F)              |                             |

Note: “-” means the sequence terminus.

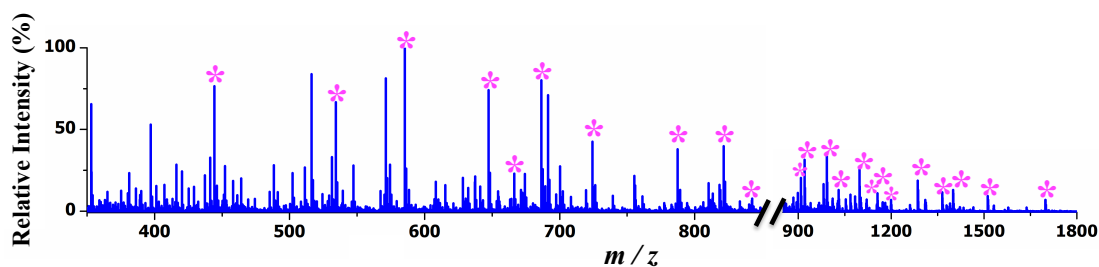

**Supplementary Figure 7:** Peptides identified from elastase digests of the heavy chain of therapeutic antibody of trastuzumab by ESSI-MS applied with a negative voltage (-3 kV). Magenta asterisks denote the peptide fragments.

**Supplementary Table 9:** Peptides identified from elastase digests of the heavy chain of therapeutic antibody of trastuzumab by ESSI-MS applied with a negative voltage (-3 kV).

| <i>m/z</i> | <i>z</i> | Mw      | Sequence               |
|------------|----------|---------|------------------------|
| 444.25     | 1        | 445.25  | (A)VLQS(S)             |
| 534.31     | 1        | 535.31  | (V)SLTCL(V)            |
| 585.33     | 1        | 586.33  | (-)EVQLV(E)            |
| 647.36     | 1        | 648.36  | (A)RIYPT(N)            |
| 686.38     | 1        | 687.38  | (S)SVVTVPS(S)          |
| 724.36     | 1        | 725.36  | (S)SGLYSLS(S)          |
| 654.35     | 2        | 1310.7  | (V)RQAPGKGLEWVA(R)     |
| 787.4      | 1        | 788.4   | (I)SRTPEVT(C)          |
| 821.5      | 1        | 822.5   | (S)NKALPAPI(E)         |
| 842.38     | 1        | 843.38  | (T)NGYTRYA(D)          |
| 908.53     | 1        | 909.53  | (V)SNKALPAPI(E)        |
| 920.42     | 1        | 921.42  | (V)SWNSGALTS(G)        |
| 992.48     | 1        | 993.48  | (V)KDYFPEPV(T)         |
| 1030.57    | 1        | 1031.57 | (A)STKGPSVFPL(A)       |
| 1097.61    | 1        | 1098.61 | (T)KGPSVFPLAPS(S)      |
| 1119.54    | 1        | 1120.54 | (S)RWQQGNVFS(C)        |
| 1155.58    | 1        | 1156.58 | (V)ESGGGLVQPGGSL(R)    |
| 1309.71    | 1        | 1310.71 | (V)RQAPGKGLEWVA(R)     |
| 1364.67    | 1        | 1365.67 | (L)GCLVKDYFPEPV(T)     |
| 1399.81    | 1        | 1400.81 | (S)VFLFPPKPKDTL(M)     |
| 1577.79    | 1        | 1578.79 | (A)SGFNIKDTYIHWV(R)    |
| 1697.94    | 1        | 1698.94 | (L)LGGPSVFLFPPKPKDT(L) |

**Note:** “-” means the sequence terminus.



## Heavy chain: 74% sequence coverage

EVQLVESGGGLVQPGGSLRLSCAASGFNKDTYIHVWRQAPGKGLEWVARIYPTNGYTRYADSV  
KGRFTISADTSKNTAYLQMNSLRAEDTAVYYCSRWGGDGFYAMDYWGQGLTVTVSSASTKGPS  
VFPLAPSSKSTSGGTAALGCLVKDYFPEPVTVSWNSGALTSGVHTFPAVLQSSGLYSLSSVTVPS  
SSLGTQTYICNVNHKPSNTKVDKKVEPKSCDKTHTCPPCPAPELLGGPSVFLFPPKPKDTLMISRT  
PEVTCVVVDVSHEDPEVKFNWYVDGVEVHNAKTKPREEQYNSTYRVVSVLTVLHQDWLNGKE  
YKCKVSNKALPAPIEKTISKAKGQPREPQVYTLPPSREEMTKNQVSLTCLVKGFYPSDIAVEWES  
NGQPENNYKTTTPVLDSDGSFFLYSKLTVDKSRWQQGNVFCFSVMHEALHNHYTQKSLSLSPGK

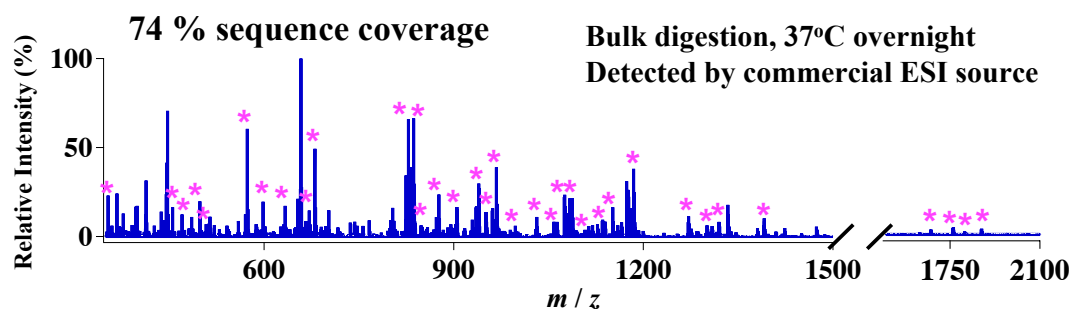

**Supplementary Figure 8:** Peptides identified with the commercial ESI-MS under a negative voltage (-3 kV) from tryptic digests of the heavy chain of therapeutic antibody of trastuzumab in bulk overnight at 37°C. Magenta asterisks denote the peptide fragments. The sequence marked in magenta was found from the tryptic digests in bulk and the left ones in black were lost.

**Supplementary Table 10:** Peptides identified with the commercial ESI-MS under a negative voltage (-3 kV) from tryptic digests of the heavy chain of therapeutic antibody of trastuzumab in bulk overnight at 37°C.

| m/z     | z | Mw      | sequence                              | modification                |
|---------|---|---------|---------------------------------------|-----------------------------|
| 359.2   | 1 | 360.2   | (K)VDK(K)                             |                             |
| 455.24  | 1 | 456.24  | (K)GQPR(E)                            |                             |
| 470.27  | 1 | 471.27  | (K)VEPK(S)                            |                             |
| 498.27  | 1 | 499.27  | (R)QAPGK(G)                           |                             |
| 499.3   | 1 | 500.3   | (K)TKPR(E)                            |                             |
| 507.19  | 1 | 508.19  | (K)SCDK(T)                            | Carbamidomethyl             |
| 573.33  | 1 | 574.33  | (K)LTVDK(S)                           |                             |
| 598.36  | 1 | 599.36  | (K)KVEPK(S)                           |                             |
| 626     | 3 | 1881    | (-)EVQLVESGGGLVQPGGSLR(L)             |                             |
| 665.78  | 2 | 1333.56 | (R)AEDTAVYYCSR(W)                     | Carbamidomethyl             |
| 680.33  | 1 | 681.33  | (R)YADSVK(G)                          |                             |
| 828.44  | 1 | 829.44  | (K)GLEWVAR(I)                         |                             |
| 833.42  | 1 | 834.42  | (K)DTLMISR(T)                         |                             |
| 836.49  | 1 | 837.49  | (K)ALPAPIEK(T)                        |                             |
| 848.39  | 2 | 1698.78 | (K)VSNKALPAPIEKTISK(A)                |                             |
| 850.42  | 1 | 851.42  | (K)DTLMISR(T)                         |                             |
| 868.35  | 2 | 1738.7  | (R)EEMTKNQVSLTCLVK(G)                 | Oxidation                   |
| 896.4   | 2 | 1794.8  | (R)EEMTKNQVSLTCLVK(G)                 | Carbamidomethyl & Oxidation |
| 902.5   | 2 | 1807    | (R)VVSVLTVLHQDWLNGK(E)                |                             |
| 935.46  | 2 | 1872.92 | (K)TTPVLDSDGSFFLYSK(L)                |                             |
| 940     | 2 | 1882    | (-)EVQLVESGGGLVQPGGSLR(L)             |                             |
| 950.96  | 2 | 1903.92 | (R)EPQVYTLPPSREEMTK(N)                |                             |
| 961     | 2 | 1924    | (K)AKGQPREPQVYTLPPSR(E)               |                             |
| 967     | 1 | 968     | (R)FTISADTSK(N)                       |                             |
| 979.98  | 2 | 1961.96 | (R)IYPTNGYTRYADSVKGR(F)               |                             |
| 990.47  | 2 | 1982.94 | (K)CKVSNKALPAPIEKTISK(A)              | Carbamidomethyl             |
| 1031.51 | 1 | 1032.51 | (K)KVEPKSCDK(T)                       |                             |
| 1083.51 | 1 | 1084.51 | (R)IYPTNGYTR(Y)                       |                             |
| 1087.54 | 1 | 1088.54 | (K)DTYIHWVR(Q)                        |                             |
| 1107.48 | 1 | 1108.48 | (R)LSCAASGFNIK(D)                     |                             |
| 1113.1  | 2 | 2228.2  | (R)VVSVLTVLHQDWLNGKEYK(C)             |                             |
| 1159.62 | 1 | 1160.62 | (K)NQVSLTCLVK(G)                      | Carbamidomethyl             |
| 1165.58 | 1 | 1166.58 | (R)LSCAASGFNIK(D)                     | Carbamidomethyl             |
| 1184.64 | 1 | 1185.64 | (K)GPSVFPLAPSSK(S)                    |                             |
| 1271.06 | 2 | 2544.12 | (K)GFYPSDIAVEWESNGQPENNYK(T)          |                             |
| 1284.67 | 1 | 1285.67 | (R)EPQVYTLPPSR(E)                     |                             |
| 1308.64 | 1 | 1309.64 | (K)NTAYLQMNSLR(A)                     |                             |
| 1319.67 | 1 | 1320.67 | (K)STSGGTAALGCLVK(D)                  | Carbamidomethyl             |
| 1325.64 | 1 | 1326.64 | (K)NTAYLQMNSLR(A)                     | Oxidation                   |
| 1391.13 | 2 | 2784.26 | (R)WGGDGFYAMDYWGQGLVTVSSASTK(G)       |                             |
| 1675.79 | 1 | 1676.79 | (K)FNWYVDGVEVHNAK(T)                  |                             |
| 1763.37 | 2 | 3528.74 | (R)WQQGNVFCSSVMHEALHNHYTQKSLSLSPGK(-) | Oxidation                   |
| 1806    | 1 | 1807    | (R)VVSVLTVLHQDWLNGK(E)                |                             |
| 1872.92 | 1 | 1873.92 | (K)TTPVLDSDGSFFLYSK(L)                |                             |

**Note:** “-” means the sequence terminus.

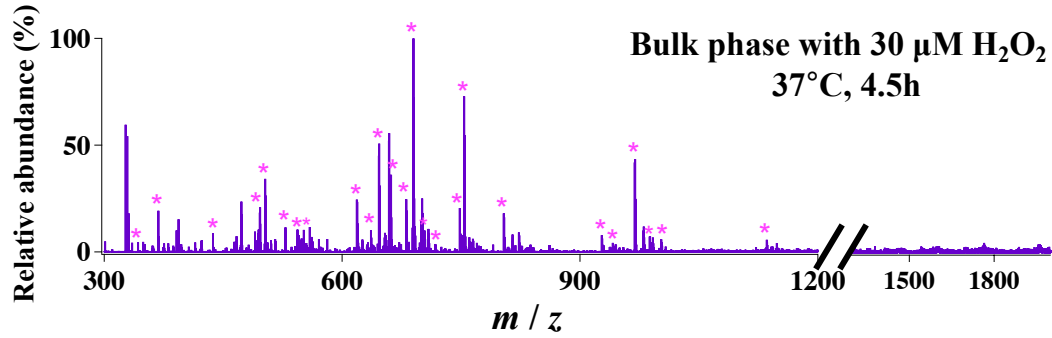

**Supplementary Figure 9:** Commercial ESI-MS (+3 kV) analysis of myoglobin digests in bulk phase (5 mM  $\text{NH}_4\text{HCO}_3$ , pH 8) containing 30  $\mu\text{M}$   $\text{H}_2\text{O}_2$ , at 37°C for 4.5 h. Magenta asterisks denote the peptide fragments.

**Supplementary Table 11:** Commercial ESI-MS (+3 kV) analysis of myoglobin digests in bulk phase (5 mM  $\text{NH}_4\text{HCO}_3$ , pH 8) containing 30  $\mu\text{M}$   $\text{H}_2\text{O}_2$ , at 37°C for 4.5h.

| Observed peaks, $m/z$ , Th | Charge state, $z$ | Peptide sequence                       |
|----------------------------|-------------------|----------------------------------------|
| 342.7                      | 2                 | (K)FDKFK(H)                            |
| 368.2                      | 2                 | (K)HKIPIK(Y)                           |
| 423                        | 5                 | (K)KKGHHEAELKPLAQSHATK(H)              |
| 496.5                      | 4                 | (K)KKGHHEAELKPLAQSHATK(H)              |
| 502.9                      | 3                 | (K)KHGTVVLTALGGILK(K)                  |
| 528.5                      | 4                 | (K)KKGHHEAELKPLAQSHATK(H)              |
| 543.8                      | 2                 | (K)HLKTEAEMK(A)                        |
| 551.7                      | 2                 | (K)HLKTEAEM <sup>ox</sup> K(A)         |
| 618.6                      | 3                 | (K)GHHEAELKPLAQSHATK(H)                |
| 636.3                      | 2                 | (R)LFTGHPETLEK(F)                      |
| 646.6                      | 3                 | (R)LFTGHPETLEKFDKFK(H)                 |
| 661.7                      | 3                 | (K)KKGHHEAELKPLAQSHATK(H)              |
| 680.8                      | 2                 | (K)ALELFRNDIAAK(Y)                     |
| 689.9                      | 2                 | (K)HGTVVLTALGGILK(K)                   |
| 704                        | 3                 | (K)KKGHHEAELKPLAQSHATK(H)              |
| 717.4                      | 3                 | (K)ASEDLKKGTVVLTALGGILK(K)             |
| 748.4                      | 1                 | (K)ALELFR(N)                           |
| 753.9                      | 2                 | (K)KHGTVVLTALGGILK(K)                  |
| 803.9                      | 2                 | (K)VEADIAGHGQEVLR(L)                   |
| 927.5                      | 2                 | (K)GHHEAELKPLAQSHATK(H)                |
| 945                        | 4                 | (R)LFTGHPETLEKFDKFKHLKTEAEMKASEDLK(H)  |
| 969.5                      | 2                 | (R)LFTGHPETLEKFDKFK(H)                 |
| 992                        | 2                 | (K)KKGHHEAELKPLAQSHATK(H)              |
| 1002.5                     | 3                 | (R)LFTGHPETLEKFDKFKHLKTEAEMK(A)        |
| 1135.5                     | 3                 | (-)MGLSDGEWQQVNLNVWGKVEADIAGHGQEVLR(L) |

**Note:** “-” means the sequence terminus.

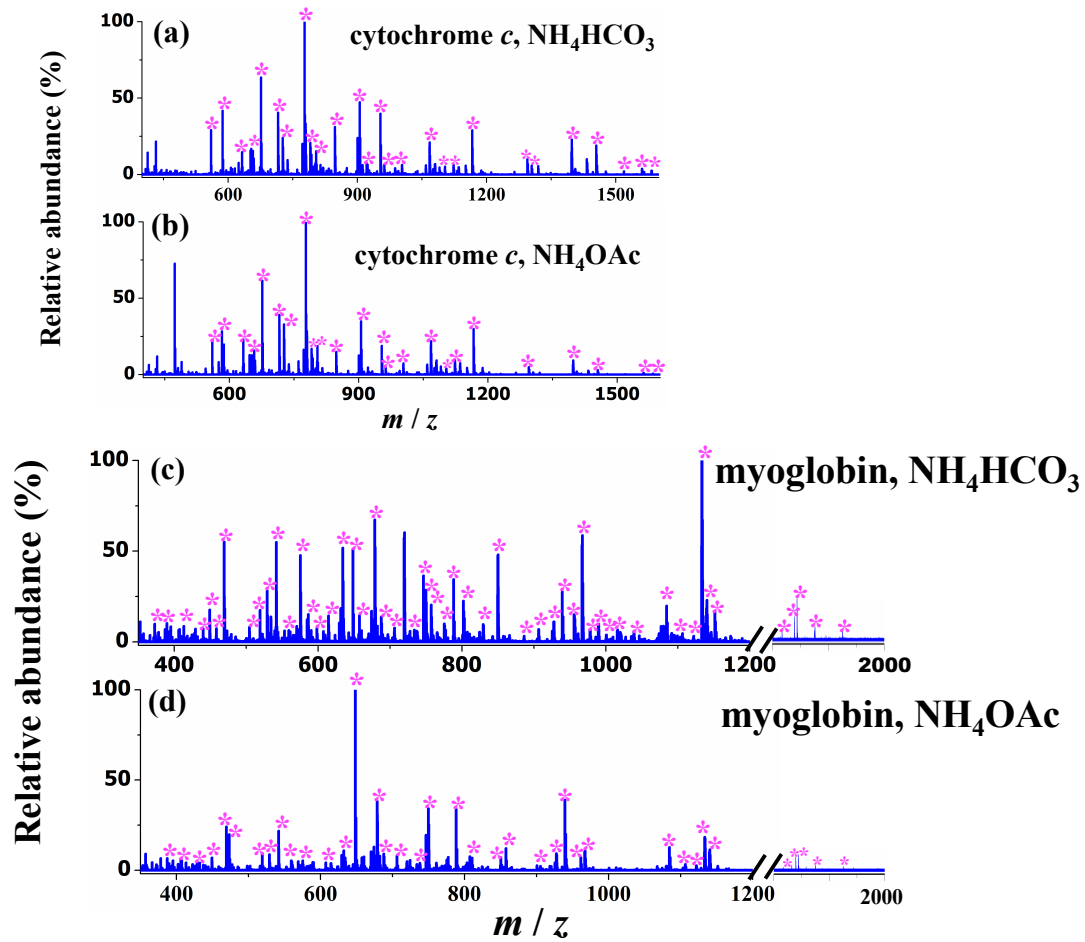

**Supplementary Figure 10:** ESSI-MS (-3 kV) analysis of protein digests in different buffer solution: (a) 10  $\mu\text{M}$  cytochrome *c* in 5 mM ammonium bicarbonate ( $\text{NH}_4\text{HCO}_3$ , pH 8), (b) 10  $\mu\text{M}$  cytochrome *c* in 5 mM ammonium acetate ( $\text{NH}_4\text{OAc}$ , pH 8), (c) 10  $\mu\text{M}$  myoglobin in 5 mM  $\text{NH}_4\text{HCO}_3$  (pH 8), and (d) 10  $\mu\text{M}$  myoglobin in 5 mM  $\text{NH}_4\text{OAc}$  (pH 8). Trypsin concentration was always kept as 5  $\mu\text{g}/\text{mL}$  in respective buffer solution. Magenta asterisks denote the peptide fragments.
